# Supplementary material
Source: PubMed Central journal article supplement (PMC3591985)
Supplement: 77.1.53_zmr999092320so2.pdf [file 77.1.53_zmr999092320so2.pdf]

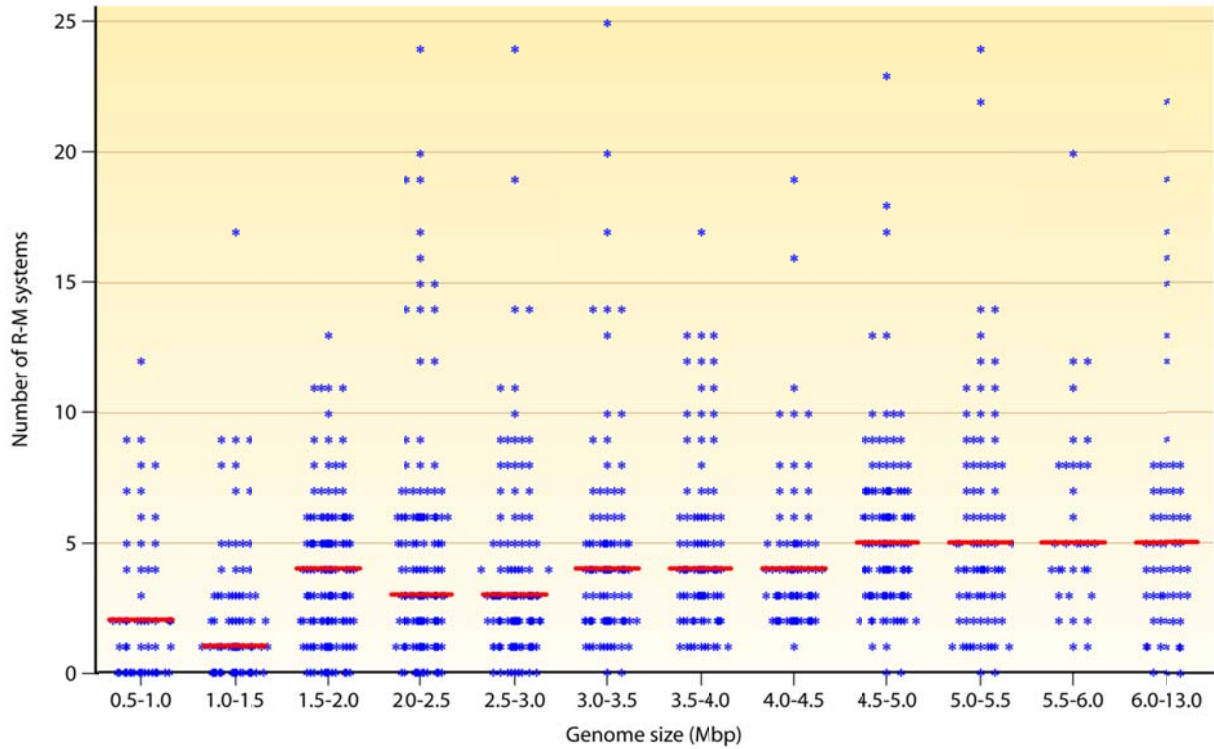

**Fig. S1. Distribution of R-M systems.** (A) Genome wide analysis for the presence of conserved MTase genes among bacteria with genome size ranging from 0.5 to 13 Mbp. The scatter plot shows the distribution, with genome size interval on x-axis and number of MTase genes in a given genome on y-axis. The median value determined by GraphPad prism V4 is shown as an orange color bar.
