# Supplementary material
Source: PubMed Central journal article supplement (PMC3591985)
Supplement: 77.1.53_zmr999092320so4.pdf [file 77.1.53_zmr999092320so4.pdf]

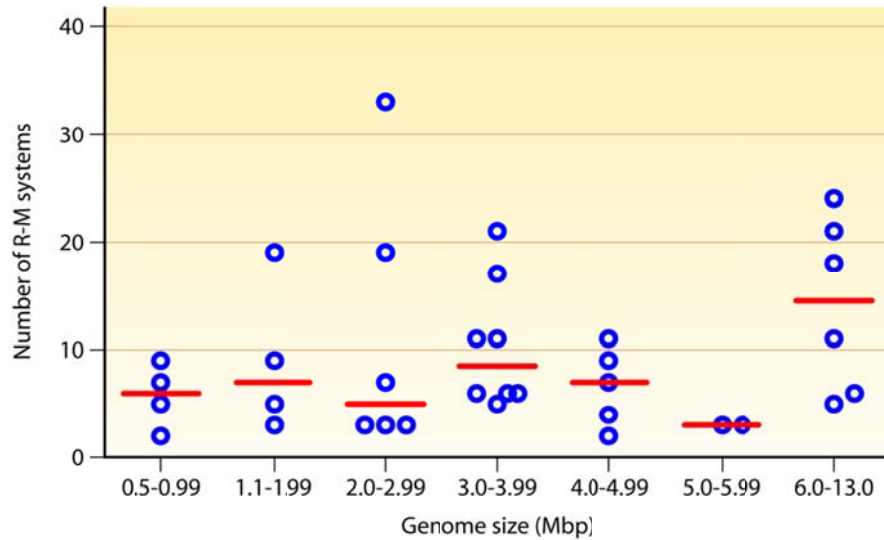

**Fig. S3. Distribution of R-M systems in RecBC- organisms.** (A) Genome wide analysis for the presence of conserved MTase genes among RecBC- bacteria with genome size ranging from 0.5 to 13 Mbp. The scatter plot shows the distribution, with genome size interval on x-axis and number of MTase genes in a given genome on y-axis. The median value determined by GraphPad prism V4 is shown as an orange color bar. The list of RecBC- organisms were taken from (1). The low median value observed in the 5-5.99 Mbp genome range is due to less number of organisms in this class interval.
